# Supplementary material for: Intrinsic 40Hz-phase asymmetries predict tACS effects during conscious auditory perception
Source: PLoS One. 2019 Apr 3;14(4):e0213996. doi: 10.1371/journal.pone.0213996 (PMC6447177; doi:10.1371/journal.pone.0213996)
Supplement: S1 Table — Corrected p-values (tmax-method) for the non-parametric paired sample permutation test (related to Figure A in S1 Fig), which was applied to the intrinsic phase asymmetries at 40Hz during left ear and right ear processing after excluding three participants with a negative LI (n = 23). The permutation distribution was computed by randomly switching condition labels within participants in each of 10.000 iterations. (XLSX) [file pone.0213996.s007.xlsx]

## Sheet: Tabelle1
S1 Table. Corrected p-values for supplementary permutation statistics (related to S1 Figure)
epoch	32-36ms	36-40ms	40-44ms	44-48ms	48-52ms	52-56ms	56-60ms
p-value	.4775	.1897	.0489	.0187	.0322	.0519	.0422
